# Supplementary material
Source: Springer Nature journal article supplement (https://www.springermedizin.de/resource/supplementary/12865_2012_460_MOESM8_ESM.pdf/9428006)

**A.**PNA<sup>+</sup>  
Germinal CentersB7h<sup>-/-</sup>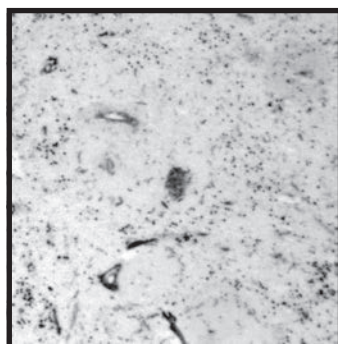B-B7hTg  
x  
B7h<sup>-/-</sup>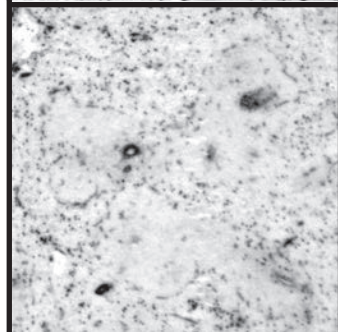DC-B7hTg  
x  
B7h<sup>-/-</sup>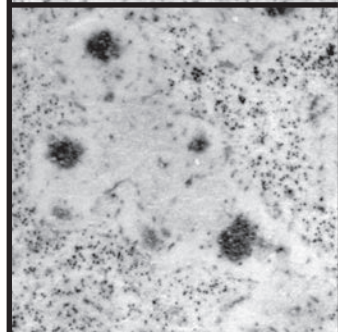DC-B7hTg  
B-B7hTg  
x  
B7h<sup>-/-</sup>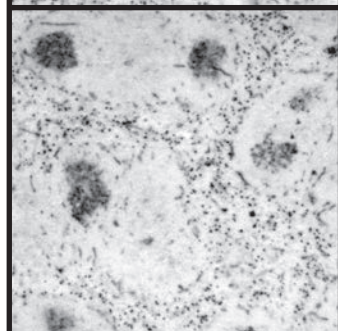B7h<sup>+/+</sup>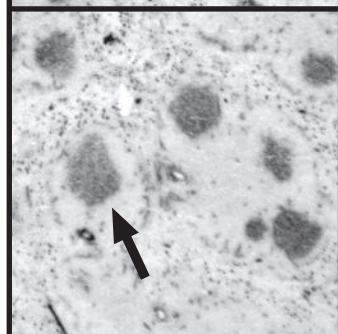**B.**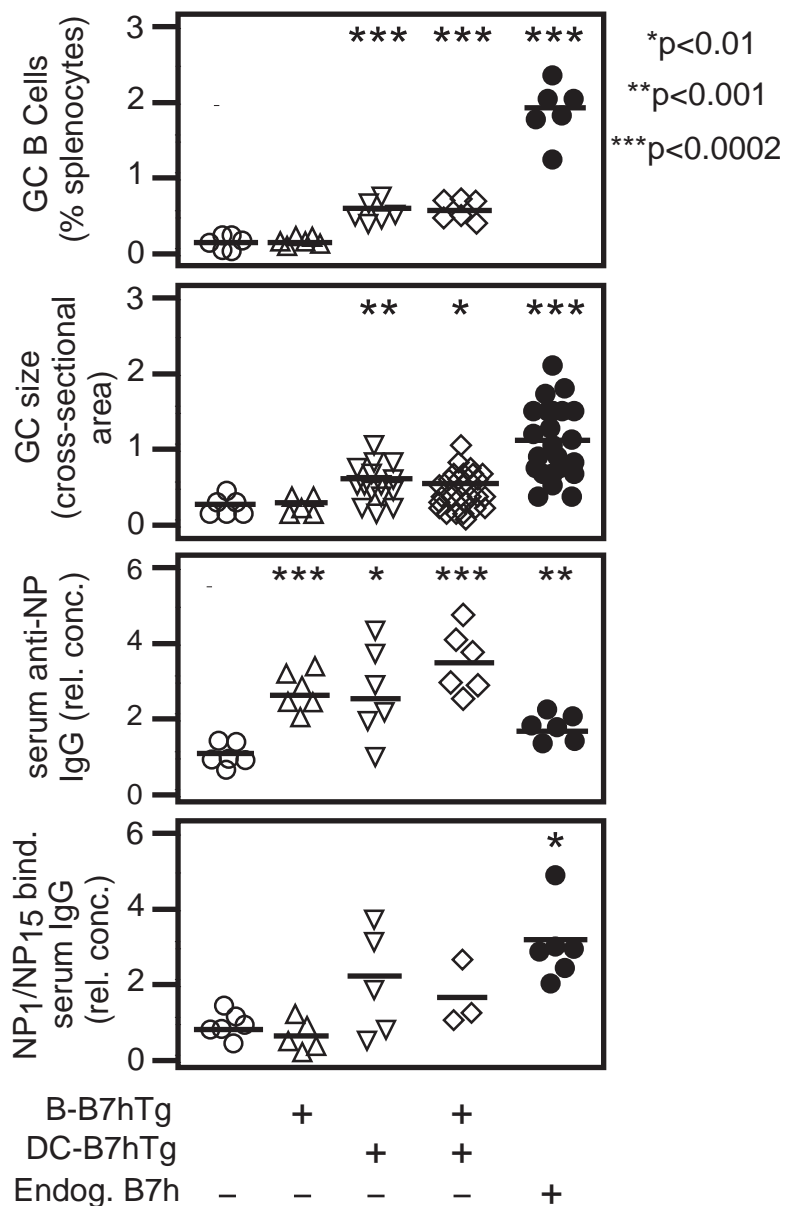**C.**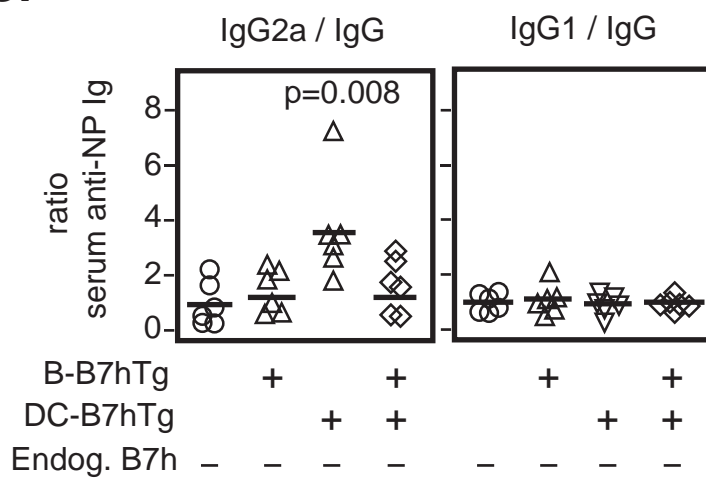

Supplement: MOESM8 [file 9428006]
